# Supplementary material for: Hybrid Membranes of the Ureasil-Polyether Containing Glucose for Future Application in Bone Regeneration
Source: MDPI journal article supplement (doi:10.3390/pharmaceutics15051474), 2023-05-12
Supplement: s1 [file s1]

# Hybrid Membranes of the Ureasil-Polyether Containing Glucose for Future Application in Bone Regeneration

Camila Garcia da Silva <sup>1</sup>, João Rodrigues Monteiro <sup>1</sup>, João Augusto Oshiro-Júnior <sup>2</sup>  
and Leila Aparecida Chiavacci <sup>1,\*</sup>

<sup>1</sup> School of Pharmaceutical Sciences, São Paulo State University (UNESP), Araraquara 14800-903, SP, Brazil

<sup>2</sup> Graduate Program in Pharmaceutical Sciences, Biological and Health Sciences Center, State University of Paraíba (UEPB), Campina Grande 58429-500, PB, Brazil

\* Correspondence: leila.chiavacci@unesp.br

**Table S1.** Quantities of reagents used in the synthesis of precursors.

| <i>Precursor</i> | <i>ICPTES</i> | <i>Polymer</i>                                     | <i>Ethanol</i> |
|------------------|---------------|----------------------------------------------------|----------------|
| PEO500           | 21.67 mL      | 25 g                                               | 50 mL          |
|                  |               | (PEO - molecular weight 500 g.mol <sup>-1</sup> )  |                |
| PPO4000          | 3.26 mL       | 25g                                                | 50 mL          |
|                  |               | (PPO - molecular weight 4000 g.mol <sup>-1</sup> ) |                |

**Table S2.** Tg values (°C) obtained from the DSC curves for the hybrid membranes.

| <i>Material</i>                             | <i>Tg (°C)</i> |
|---------------------------------------------|----------------|
| Ureasil-PEO500 (100%)                       | - 30.40        |
| Ureasil-PEO500 (100%) + 6% glucose          | - 23.90        |
| Ureasil-PPO4000 (100%)                      | - 62.80        |
| Ureasil-PPO4000 (100%) + 6% glucose         | - 62.92        |
| Ureasil-PEO500/PPO4000 (20/80)              | - 62.82        |
| Ureasil-PEO500/PPO4000 (20/80) + 6% glucose | - 62.99        |
| Ureasil-PEO500/PPO4000 (40/60)              | - 62.20        |
| Ureasil-PEO500/PPO4000 (40/60) + 6% glucose | - 62.34        |

**Table S3.** Information obtained through the Korsmeyer-Peppas equation for the glucose release curves from the hybrid membranes.

| <i>Material</i>                             | <i>r</i> <sup>2</sup> | <i>n</i> | <i>Release mechanism</i>             |
|---------------------------------------------|-----------------------|----------|--------------------------------------|
| Ureasil-PEO500/PPO4000 (20/80) + 6% glucose | 0.9806                | 0.48     | Anomalous transport<br>(non-Fickian) |
| Ureasil-PEO500/PPO4000 (40/60) + 6% glucose | 0.9357                | 0.47     | Anomalous transport<br>(non-Fickian) |

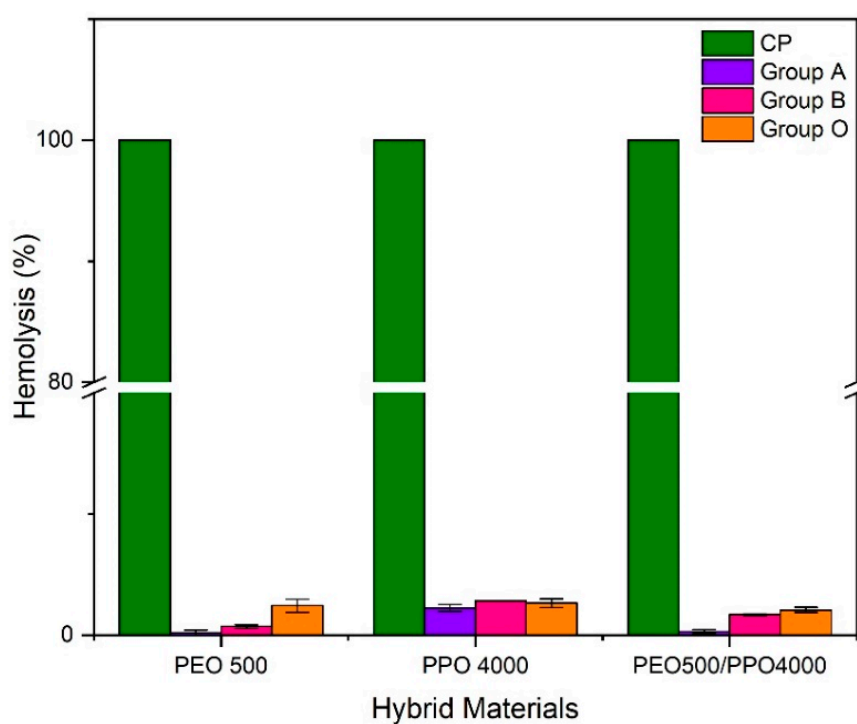

**Figure S1.** Comparison of the percentage of hemolysis between loaded 6% glucose membranes, ureasil-PEO500 and PPO4000, and blend of ureasil-PEO500/PPO4000 (50/50).
